# Supplementary material for: Latrine ecology of a solitary ungulate, the Japanese serow: female–male communication site rather than territorial marking?
Source: publisher site journal article supplement (doi:10.1515/mammalia-2024-0175), 2025-04-05
Supplement: Supplementary file 1 [file j_mammalia-2024-0175_suppl_001.xlsx]

## Sheet: Online Resource 1
Supplementary Table S1: Raw data of latrine behaviour of Japanese serow at Mount Asama, central Japan.
Sex	Individuals ID	Date	Time	Season	Latrine ID	Defecation	Ulination	Sniffing	Flehmen	Sniffing Duration	Defcation duration	Ulination duration
Female	F3	2014-09-22	00:09:00	Mating season	L3a	0	0	0	0	0	0	0
Female	F3	2015-01-18	18:59:00	Late-mating season	L3a	0	0	0	0	0	0	0
Male	M3	2015-03-01	09:25:00	Non-mating season	L3a	1	0	0	0	0	42	0
Male	M3	2015-07-12	19:21:02	Non-mating season	L3a	0	0	0	0	0	0	0
Female	F3	2014-09-18	22:17:58	Mating season	L3c	0	0	0	0	0	0	0
Female	F1	2014-10-15	05:55:46	Mating season	L3c	0	0	0	0	0	0	0
Male	M3	2014-11-05	02:36:00	Mating season	L3c	0	0	0	0	0	0	0
Male	M3	2014-11-05	02:55:00	Mating season	L3c	0	0	0	0	0	0	0
Male	M3	2014-11-05	04:50:00	Mating season	L3c	0	0	0	0	0	0	0
Male	M3	2014-11-05	06:50:00	Mating season	L3c	0	0	1	0	2	0	0
Male	M3	2014-11-05	08:47:00	Mating season	L3c	0	0	1	0	1	0	0
Male	M3	2014-11-19	17:31:00	Mating season	L3c	0	0	0	0	0	0	0
Female	F3	2014-11-23	14:27:00	Mating season	L3c	0	0	1	0	3	0	0
Female	F3	2014-11-23	15:17:00	Mating season	L3c	0	0	0	0	0	0	0
Female	F3	2014-11-24	13:36:00	Mating season	L3c	0	0	0	0	0	0	0
Female	F3	2014-11-24	15:00:00	Mating season	L3c	0	0	0	0	0	0	0
Male	M3	2014-12-03	07:20:00	Late-mating season	L3c	0	0	0	0	0	0	0
Female	F3	2014-12-08	08:55:00	Late-mating season	L3c	1	1	1	0	9	60	32
Female	F3	2014-12-09	06:55:00	Late-mating season	L3c	0	0	0	0	0	0	0
Female	F3	2014-12-22	13:38:20	Late-mating season	L3c	1	0	0	0	0	90	0
Female	F3	2014-12-24	14:49:10	Late-mating season	L3c	1	1	0	0	0	123	15
Female	F3	2014-12-28	14:18:14	Late-mating season	L3c	1	1	0	0	0	67	19
Male	M3	2015-01-01	19:37:16	Late-mating season	L3c	0	0	0	0	0	0	0
Female	F3	2015-01-07	16:34:30	Late-mating season	L3c	1	1	0	0	0	182	25
Male	M3	2015-01-09	05:00:44	Late-mating season	L3c	0	0	0	0	0	0	0
Female	F3	2015-01-12	14:52:40	Late-mating season	L3c	1	1	0	0	0	184	26
Female	F3	2015-01-18	09:28:02	Late-mating season	L3c	0	0	0	0	0	0	0
Male	M3	2015-01-18	13:47:22	Late-mating season	L3c	0	0	0	0	0	0	0
Female	F3	2015-01-25	12:26:04	Late-mating season	L3c	1	1	0	0	0	116	17
Female	F3	2015-01-28	14:50:58	Late-mating season	L3c	1	1	0	0	0	208	26
Male	M3	2015-03-12	07:37:34	Non-mating season	L3c	0	0	0	0	0	0	0
Male	M3	2015-04-08	10:01:58	Non-mating season	L3c	0	0	0	0	0	0	0
Male	M3	2015-05-10	17:35:34	Non-mating season	L3c	0	0	0	0	0	0	0
Male	M3	2015-05-17	14:42:10	Non-mating season	L3c	0	0	0	0	0	0	0
Female	F3	2015-07-12	00:48:54	Non-mating season	L3c	0	0	0	0	0	0	0
Male	M3	2015-07-19	13:03:20	Non-mating season	L3c	0	0	0	0	0	0	0
Male	M3	2015-09-13	13:58:34	Mating season	L3c	0	0	0	0	0	0	0
Female	F3	2014-09-18	22:30:56	Mating season	L3b	0	0	0	0	0	0	0
Female	F3	2014-10-30	17:19:00	Mating season	L3b	0	0	0	0	0	0	0
Male	M3	2014-11-28	10:48:00	Mating season	L3b	0	0	0	0	0	0	0
Male	M3	2014-12-05	08:43:00	Late-mating season	L3b	0	0	0	0	0	0	0
Female	F3	2014-12-14	07:44:38	Late-mating season	L3b	1	0	0	0	0	108	0
Male	M3	2014-12-21	09:38:30	Late-mating season	L3b	0	0	0	0	0	0	0
Male	M3	2015-01-01	13:44:34	Late-mating season	L3b	0	0	0	0	0	0	0
Female	F3	2015-02-01	12:27:02	Non-mating season	L3b	0	0	0	0	0	0	0
Male	M3	2015-02-03	22:38:08	Non-mating season	L3b	0	0	0	0	0	0	0
Female	F3	2015-02-08	18:32:00	Non-mating season	L3b	0	0	1	0	20	0	0
Male	M3	2015-02-13	21:51:00	Non-mating season	L3b	0	0	0	0	0	0	0
Male	M3	2015-02-22	12:29:00	Non-mating season	L3b	0	0	0	0	0	0	0
Male	M3	2015-02-27	20:32:00	Non-mating season	L3b	0	0	0	0	0	0	0
Male	M3	2015-06-11	19:32:44	Non-mating season	L3b	0	0	0	0	0	0	0
Male	M3	2015-07-03	18:17:28	Non-mating season	L3b	0	0	0	0	0	0	0
Male	M3	2015-09-28	07:06:20	Mating season	L3b	0	0	0	0	0	0	0
Female	F1	2014-12-18	14:55:00	Late-mating season	L1a	1	0	1	0	5	100	0
Female	F1	2014-12-28	06:24:00	Late-mating season	L1a	0	0	1	0	2	0	0
Female	F1	2014-12-28	12:15:00	Late-mating season	L1a	1	0	1	0	3	91	0
Male	M1	2014-12-28	23:27:00	Late-mating season	L1a	0	0	1	0	11	0	0
Female	F1	2014-12-29	13:51:00	Late-mating season	L1a	1	0	0	0	0	78	0
Female	F1	2014-12-29	18:08:00	Late-mating season	L1a	0	0	1	0	11	0	0
Female	F1	2014-12-30	08:59:00	Late-mating season	L1a	0	0	1	0	14	0	0
Female	F1	2014-12-30	11:21:00	Late-mating season	L1a	1	0	0	0	0	48	0
Female	F1	2015-01-01	02:18:00	Late-mating season	L1a	0	0	0	0	0	0	0
Female	F1	2015-01-16	13:49:00	Late-mating season	L1a	1	0	0	0	0	102	0
Female	F1	2015-01-19	08:48:00	Late-mating season	L1a	0	0	1	0	3	0	0
Female	F1	2015-01-23	17:28:00	Late-mating season	L1a	0	0	0	0	0	0	0
Female	F1	2015-03-17	09:35:16	Non-mating season	L1a	0	0	0	0	0	0	0
Male	M1	2015-05-13	19:36:06	Non-mating season	L1a	0	0	0	0	0	0	0
Female	F1	2015-05-18	19:25:56	Non-mating season	L1a	0	0	0	0	0	0	0
Female	F1	2015-05-22	15:51:06	Non-mating season	L1a	0	0	0	0	0	0	0
Female	F1	2015-05-23	17:24:10	Non-mating season	L1a	0	0	0	0	0	0	0
Male	M1	2015-05-24	11:38:40	Non-mating season	L1a	0	0	0	0	0	0	0
Female	F1	2015-05-31	15:24:02	Non-mating season	L1a	0	0	1	0	16	0	0
Male	M2	2015-07-04	11:26:26	Non-mating season	L1a	0	0	0	0	0	0	0
Female	F1	2015-07-20	17:33:24	Non-mating season	L1a	0	0	0	0	0	0	0
Male	M1	2015-01-05	15:20:00	Late-mating season	L1b	0	0	0	0	0	0	0
Female	F1	2015-02-14	10:53:20	Non-mating season	L1b	0	0	0	0	0	0	0
Female	F1	2015-02-21	08:07:20	Non-mating season	L1b	0	0	0	0	0	0	0
Male	M2	2015-02-21	21:36:40	Non-mating season	L1b	0	0	0	0	0	0	0
Female	F1	2015-03-03	16:31:26	Non-mating season	L1b	0	0	1	0	2	0	0
Male	M2	2015-08-12	05:34:00	Non-mating season	L1b	0	0	0	0	0	0	0
Male	M2	2015-08-12	05:34:54	Non-mating season	L1c	0	0	0	0	0	0	0
Male	M2	2014-10-15	07:03:00	Mating season	L2a	0	0	0	0	0	0	0
Female	F2	2014-11-09	09:50:00	Mating season	L2a	0	0	0	0	0	0	0
Female	F2	2014-11-19	08:23:00	Mating season	L2a	0	0	0	0	0	0	0
Male	M2	2014-12-08	07:04:00	Late-mating season	L2a	1	0	0	0	0	108	0
Female	F2	2014-12-14	19:56:00	Late-mating season	L2a	0	0	0	0	0	0	0
Female	F2	2014-12-14	23:33:00	Late-mating season	L2a	1	1	1	0	13	54	25
Male	M2	2014-12-16	08:45:00	Late-mating season	L2a	1	0	1	1	36	60	0
Male	M2	2015-02-05	07:54:00	Non-mating season	L2a	1	0	0	0	0	117	0
Female	F2	2015-02-06	16:22:00	Non-mating season	L2a	1	0	0	0	0	55	0
Female	F2	2015-02-17	18:22:00	Non-mating season	L2a	0	0	0	0	0	0	0
Male	M2	2015-03-07	13:43:00	Non-mating season	L2a	0	0	0	0	0	0	0
Male	M2	2015-03-11	11:19:46	Non-mating season	L2a	0	0	0	0	0	174	0
Male	M2	2015-05-26	05:13:52	Non-mating season	L2a	0	0	0	0	0	0	0
Female	F2	2014-09-24	13:01:00	Mating season	L2b	0	0	0	0	0	0	0
Male	M2	2014-11-15	16:43:30	Mating season	L2b	0	0	0	0	0	0	0
Male	M2	2015-03-29	12:58:00	Non-mating season	L2b	0	0	0	0	0	0	0
Male	M2	2015-04-06	07:21:00	Non-mating season	L2b	0	0	0	0	0	0	0
Male	M2	2015-04-07	09:27:00	Non-mating season	L2b	0	0	0	0	0	0	0
Male	M2	2015-05-30	05:06:00	Non-mating season	L2b	0	0	0	0	0	0	0
Male	M2	2015-06-22	08:11:00	Non-mating season	L2b	0	0	0	0	0	0	0
Male	M2	2015-06-30	07:03:00	Non-mating season	L2b	0	0	0	0	0	0	0
Female	F2	2015-09-12	18:20:00	Mating season	L2b	0	0	0	0	0	0	0

## Sheet: Information
Article Title: Latrine ecology of a solitary ungulate, Japanese serow: female-male communication centre rather than territorial marking
Journal name: Mammalia
Author Names: Hayato Takada, Haruko Watanabe, Risako Yano, Hideharu Tsukada, Masato Minami
Corresponding affiliation: Wildlife Management Center, Tokyo University of Agriculture and Technology, Fuchu, Tokyo, Japan
Corresponding email address: capricornis.murina.8810@gmail.com
DOI 10.1515/mammalia-2024-0175
